# Supplementary material
Source: PubMed Central journal article supplement (PMC100345)

Hs\_Nterm\_exol MGIOQ---LLQFIKASEP... 101  
Mus\_mus\_exol MGIOQ---LLQFIQASEP... 101  
Xenopus\_laewis\_exol MGIOQ---LLQFLKASEP... 101  
Dros\_mela\_exol MGITG---LIPFVKASSQL... 101  
Arabi\_thal\_exol MGIKD---LLRFMKPV... 104  
S\_pombe\_exol MGITG---LLGLLKPQ... 101  
S\_cerevisiae\_DHS1\_exol MGIOQ---LLPQLKPI... 101  
Hs\_fenl MGIOGLAKL... 109  
Mus\_mus\_fenl MGTHGLAKL... 107  
Xenopus\_laewis\_fenl MGTHGLAKL... 109  
Dros\_mela\_fenl MGILGLSKL... 109  
Arabi\_thal\_fenl MGIGLTKL... 110  
S\_pombe\_fenl MGIKGLA... 110  
S\_cerevisiae\_fenl MGICGLN... 107  
Methano\_jann\_rad2\_fenl MGIVP---FGDFIPK... 103  
Pyro\_furio\_fenl MGVP---FGIIPK... 103  
E\_coli\_pol\_I\_5to3exo YLSYQLATIK... 86  
Bacteriophage\_T5\_5prime\_exo FRNLLIVDL... 91

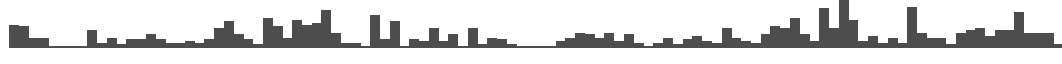

Hs\_Nterm\_exol KGKOLLREGK... 193  
Mus\_mus\_exol KGKOLLREGK... 193  
Xenopus\_laewis\_exol KGKOLLREGK... 193  
Dros\_mela\_exol RAAELLRLGR... 193  
Arabi\_thal\_exol AAMVKLKEG... 202  
S\_pombe\_exol LAGKMLDEG... 195  
S\_cerevisiae\_DHS1\_exol IAEIRWACG... 195  
Hs\_fenl QIQQAAGAE... 201  
Mus\_mus\_fenl QIQQAAGAE... 201  
Xenopus\_laewis\_fenl LLEAAEAG... 203  
Dros\_mela\_fenl ALKAA... 203  
Arabi\_thal\_fenl LDTGAI... 216  
S\_pombe\_fenl DQEEK... 204  
S\_cerevisiae\_fenl TEKTLA... 201  
Methano\_jann\_rad2\_fenl KMEAL... 195  
Pyro\_furio\_fenl KWRLE... 197  
E\_coli\_pol\_I\_5to3exo DLRAQIE... 162  
Bacteriophage\_T5\_5prime\_exo QR---TSEKAL... 177

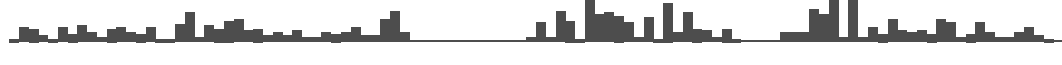

Hs\_Nterm\_exol EIDQ---ARLGMCR... 292  
Mus\_mus\_exol EVDQ---ARLGMCK... 292  
Xenopus\_laewis\_exol EIDQ---ARFGMCR... 292  
Dros\_mela\_exol LVEA---RFDQANQ... 294  
Arabi\_thal\_exol VLDN---VFQADQ... 298  
S\_pombe\_exol RLDN---RNDIANA... 288  
S\_cerevisiae\_DHS1\_exol CRDN---FTKPKP... 290  
Hs\_fenl TQEFHLSR... 293  
Mus\_mus\_fenl TQEFHLSR... 293  
Xenopus\_laewis\_fenl TQEFHLSR... 291  
Dros\_mela\_fenl VKFES... 296  
Arabi\_thal\_fenl VMEF... 303  
S\_pombe\_fenl TSEV... 294  
S\_cerevisiae\_fenl THEID... 294  
Methano\_jann\_rad2\_fenl ELIE... 275  
Pyro\_furio\_fenl GKNV... 289  
E\_coli\_pol\_I\_5to3exo R---DMVEH... 243  
Bacteriophage\_T5\_5prime\_exo R---DMVEH... 253

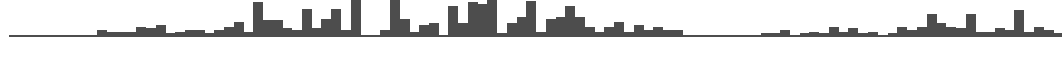

Hs\_Nterm\_exol RKLILPLNAV... 391  
Mus\_mus\_exol RKLILPLNAV... 391  
Xenopus\_laewis\_exol RKLILPLNAV... 391  
Dros\_mela\_exol RRMQR... 396  
Arabi\_thal\_exol KKLKHL... 381  
S\_pombe\_exol KTLV... 377  
S\_cerevisiae\_DHS1\_exol KKI... 371  
Hs\_fenl VELK... 351  
Mus\_mus\_fenl VELK... 349  
Xenopus\_laewis\_fenl TELK... 351  
Dros\_mela\_fenl IDLK... 355  
Arabi\_thal\_fenl LDIK... 380  
S\_pombe\_fenl LELK... 352  
S\_cerevisiae\_fenl INL... 354  
Methano\_jann\_rad2\_fenl LSL... 326  
Pyro\_furio\_fenl LVWR... 349  
E\_coli\_pol\_I\_5to3exo YLSY... 309  
Bacteriophage\_T5\_5prime\_exo FRNLL... 291

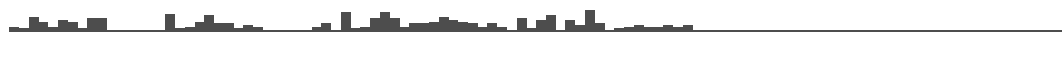

Supplement: nar_30_4_942__1.pdf [file nar_30_4_942__1.pdf]
